# Supplementary material for: High-Resolution Intravital Microscopy
Source: PubMed Central journal article supplement (PMC3522675; doi:10.1371/journal.pone.0050915), 2012-12-14
Supplement: pone.0050915.s002.pdf [file pone.0050915.s002.pdf]

**20x objective lens; NA = 0.95; WD = 2.0 mm**

**a**

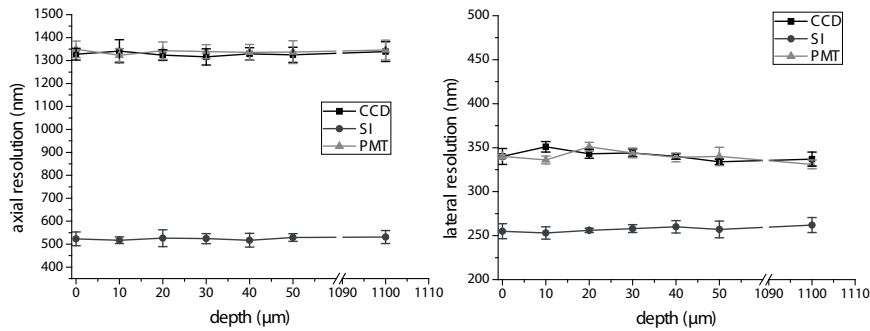

**SHG in collagen gel**

**b**

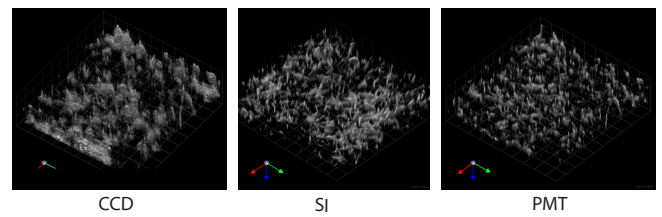

**c**

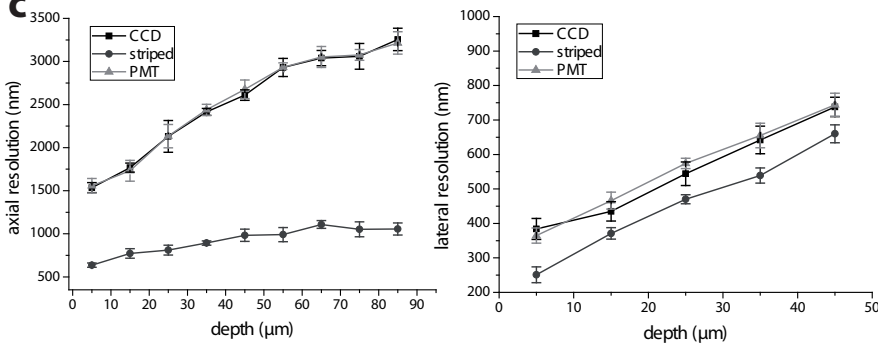

**SHG in lymph node**

**d**

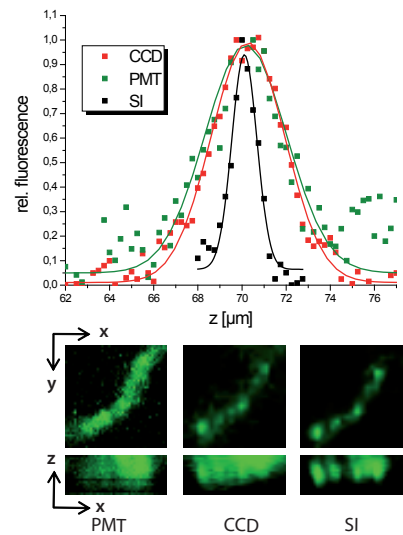

**40x objective lens; NA = 1.1; WD = 0.624 mm**

**e**

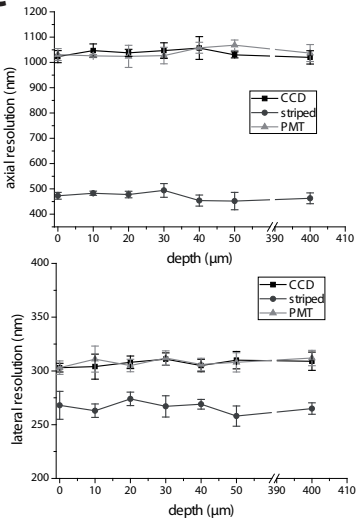

**fluorescence in agarose**

**f**

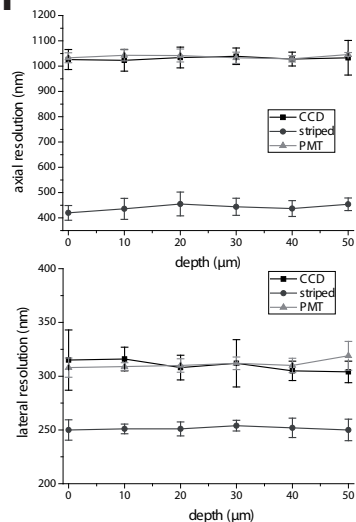

**SHG in collagen gel**

**g**

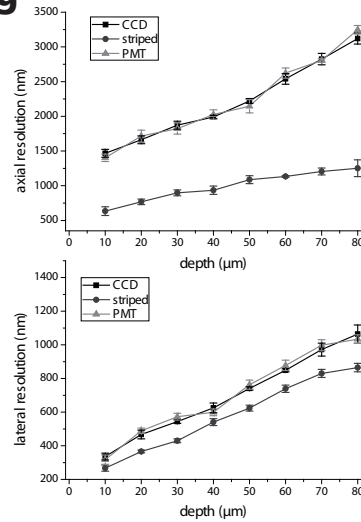

**fluorescence in lymph node**

**h**

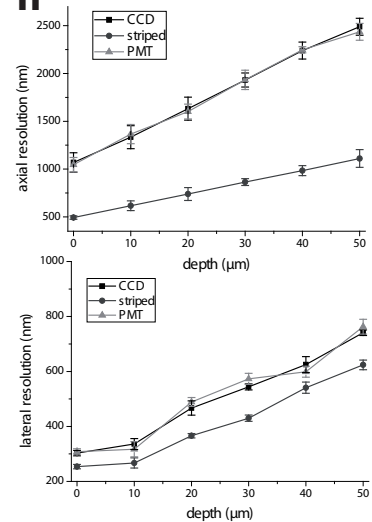

**SHG in lymph node**
