# Supplementary material for: High-Resolution Intravital Microscopy
Source: PubMed Central journal article supplement (PMC3522675; doi:10.1371/journal.pone.0050915), 2012-12-14

Time-lapse SI-MB-TPLSM imaging in germinal centers in the popliteal lymph node

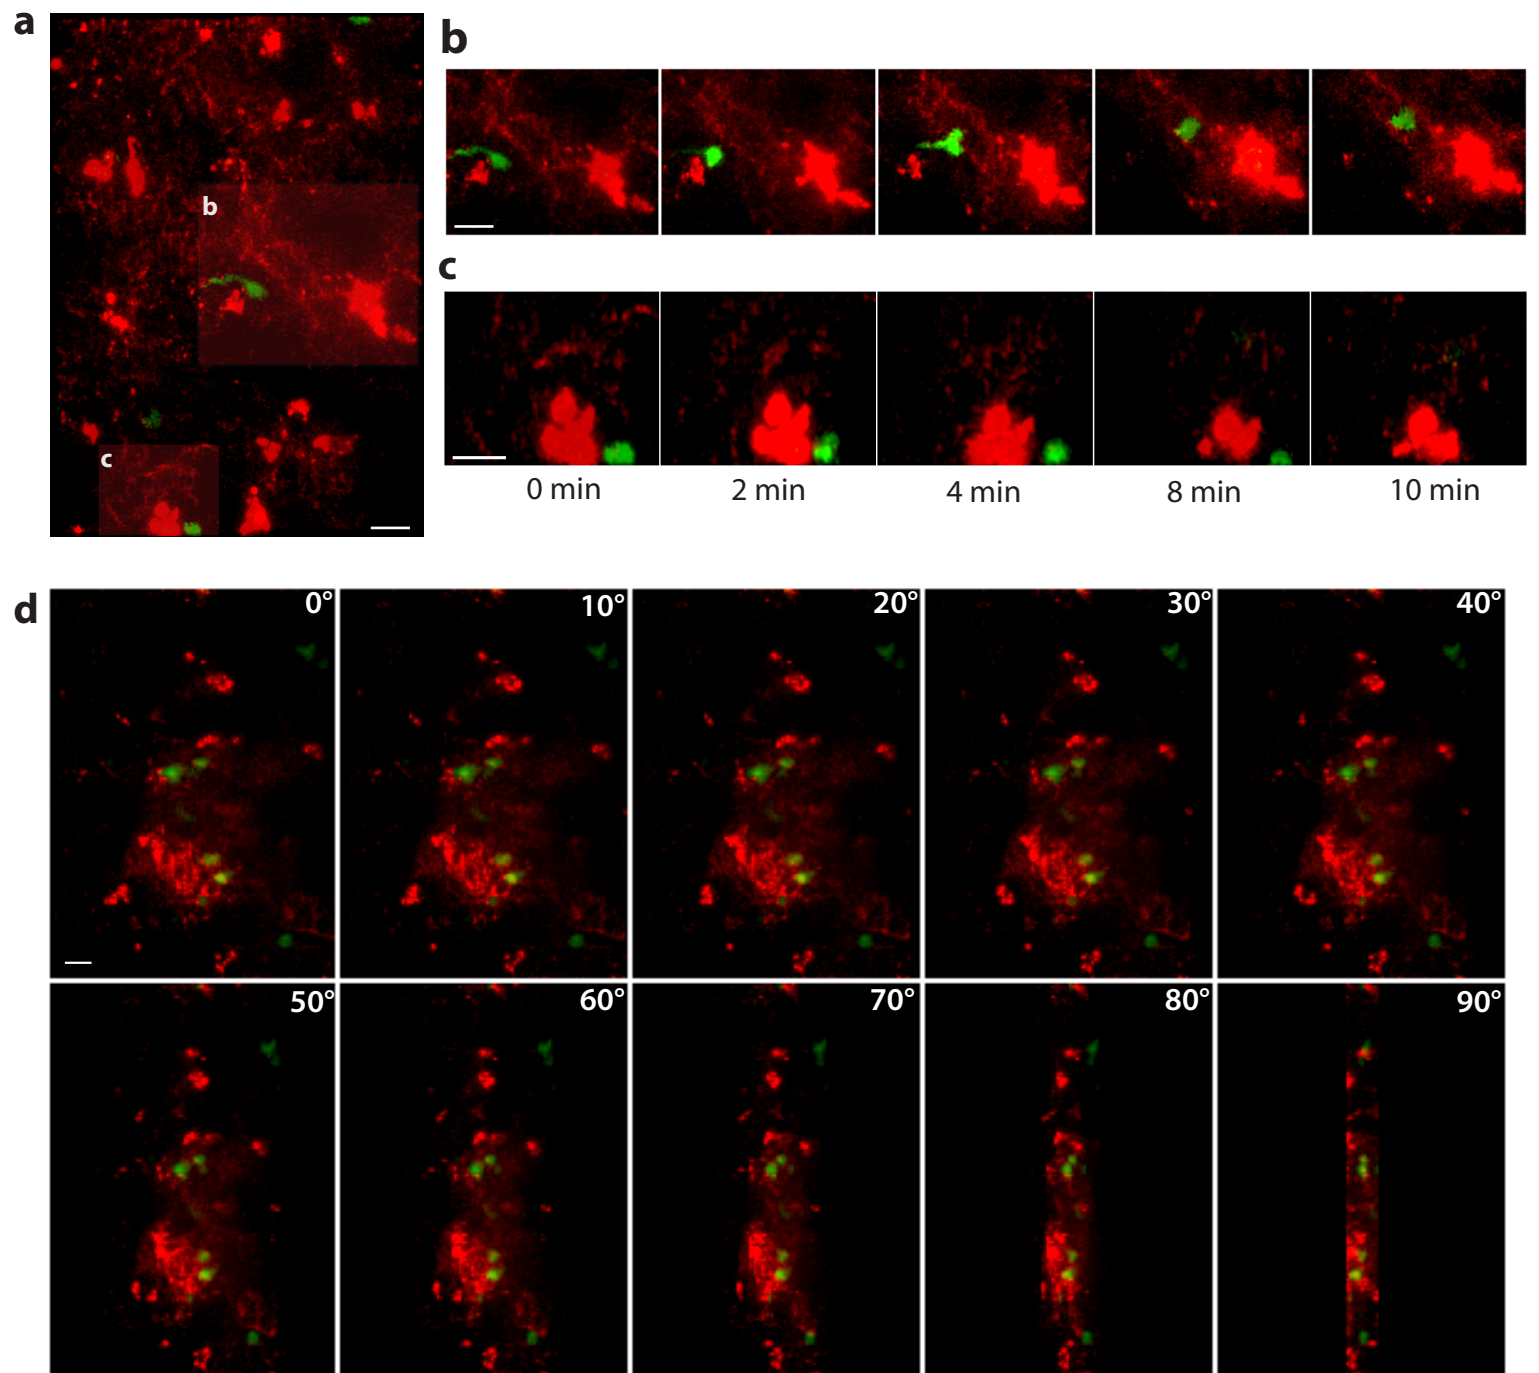

Supplement: pone.0050915.s003.pdf [file pone.0050915.s003.pdf]
