# Supplementary material for: High-Resolution Intravital Microscopy
Source: PubMed Central journal article supplement (PMC3522675; doi:10.1371/journal.pone.0050915), 2012-12-14

# B1-8 GFP+ cells dynamics in the germinal center

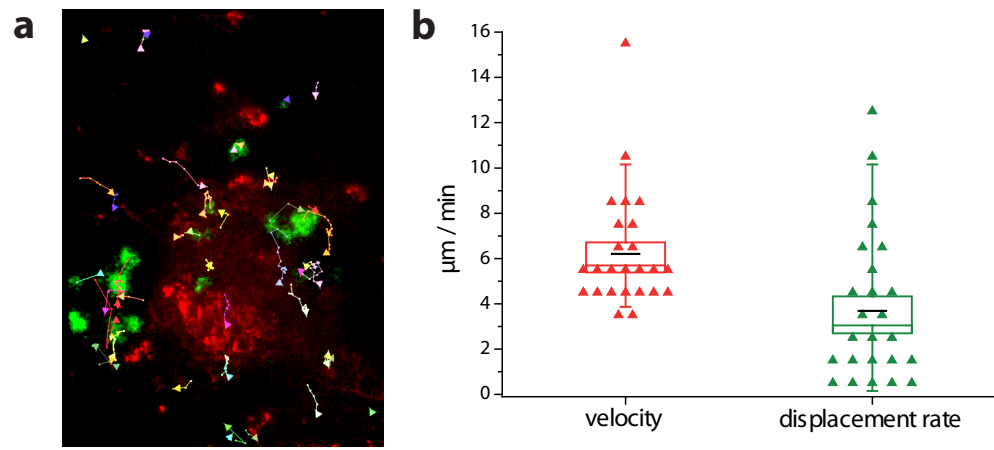

# Photobleaching of GFP expressed in B1-8 cells by SI-MB-TPLSM

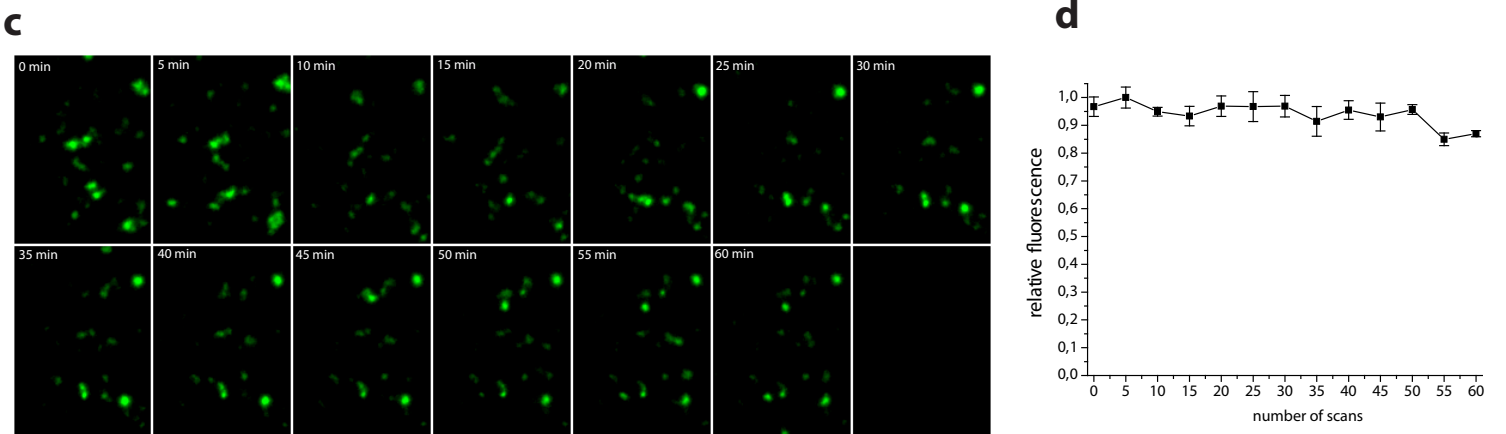

Supplement: pone.0050915.s004.pdf [file pone.0050915.s004.pdf]
